CORRECTION

# Correction: Offshore Habitat Preference of Overwintering Juvenile and Adult Black Sea Bass, *Centropristis striata*, and the Relationship to Year-Class Success

Alicia S. Miller, Gary R. Shepherd, Paula S. Fratantoni

The images for Figs 4–6 are incorrectly switched. The image that appears as [Fig 6](#) should be [Fig 5](#), the image that appears as [Fig 5](#) should be [Fig 4](#) and the image that appears as [Fig 4](#) should be [Fig 6](#).

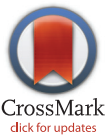

 OPEN ACCESS

**Citation:** Miller AS, Shepherd GR, Fratantoni PS (2016) Correction: Offshore Habitat Preference of Overwintering Juvenile and Adult Black Sea Bass, *Centropristis striata*, and the Relationship to Year-Class Success. PLoS ONE 11(5): e0156355. doi:10.1371/journal.pone.0156355

**Published:** May 19, 2016

**Copyright:** © 2016 Miller et al. This is an open access article distributed under the terms of the [Creative Commons Attribution License](#), which permits unrestricted use, distribution, and reproduction in any medium, provided the original author and source are credited.

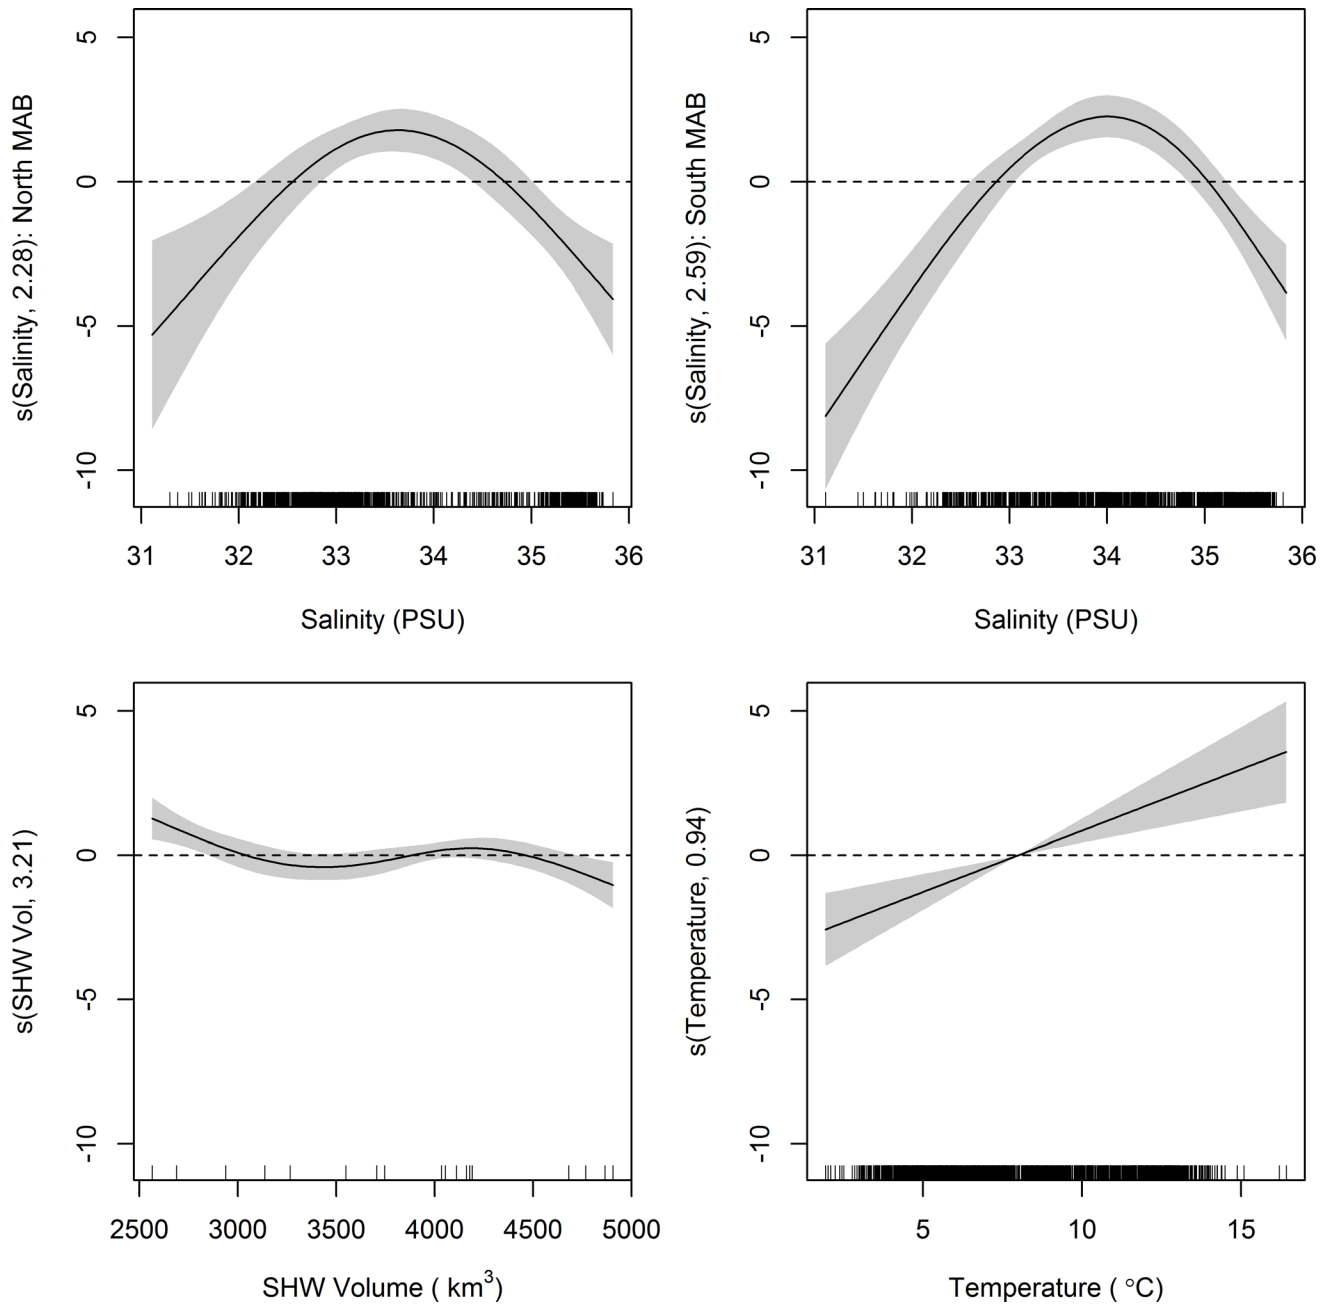

**Fig 4. Generalized additive model (GAM) plots identifying estimated effects of smoothed covariates on NEFSC spring survey catch of juvenile black sea bass.** The magnitude of the y axis indicates the relative importance of each covariate with the effective degrees of freedom for the smoother denoted in the y axis label. Shaded areas represent 2 SE confidence intervals. Rugplots along the x-axis reflect the relative density of data points.

doi:10.1371/journal.pone.0156355.g001

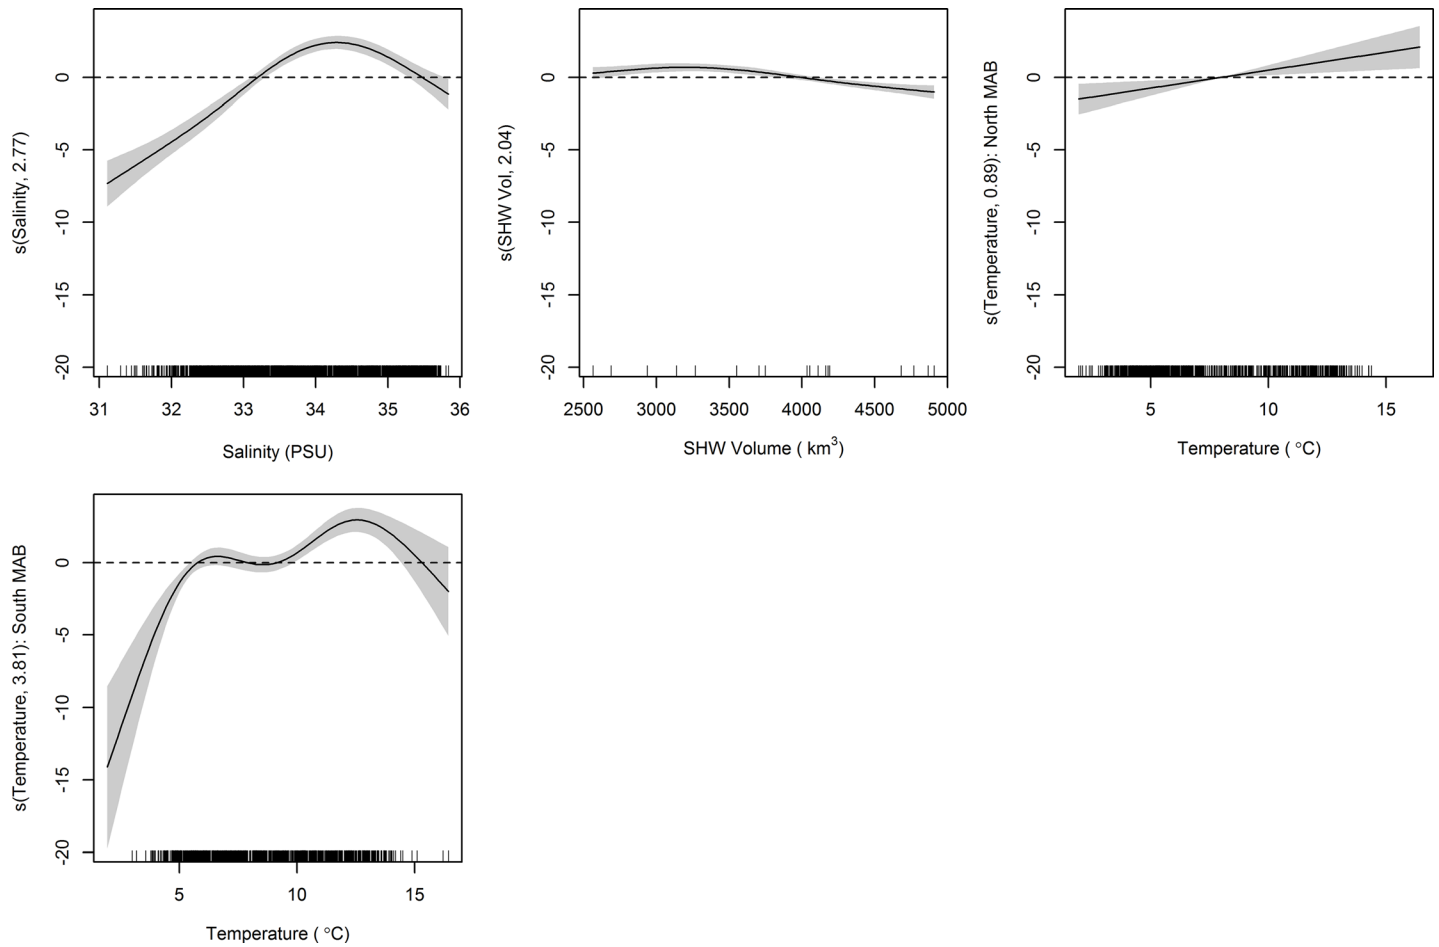

**Fig 5. Generalized additive model (GAM) plots identifying estimated effects of smoothed covariates on NEFSC spring survey catch of adult black sea bass.** The magnitude of the y axis indicates the relative importance of each covariate with the effective degrees of freedom for the smoother denoted in the y axis label. Shaded areas represent 2 SE confidence intervals. Rugplots along the x-axis reflect the relative density of data points.

doi:10.1371/journal.pone.0156355.g002

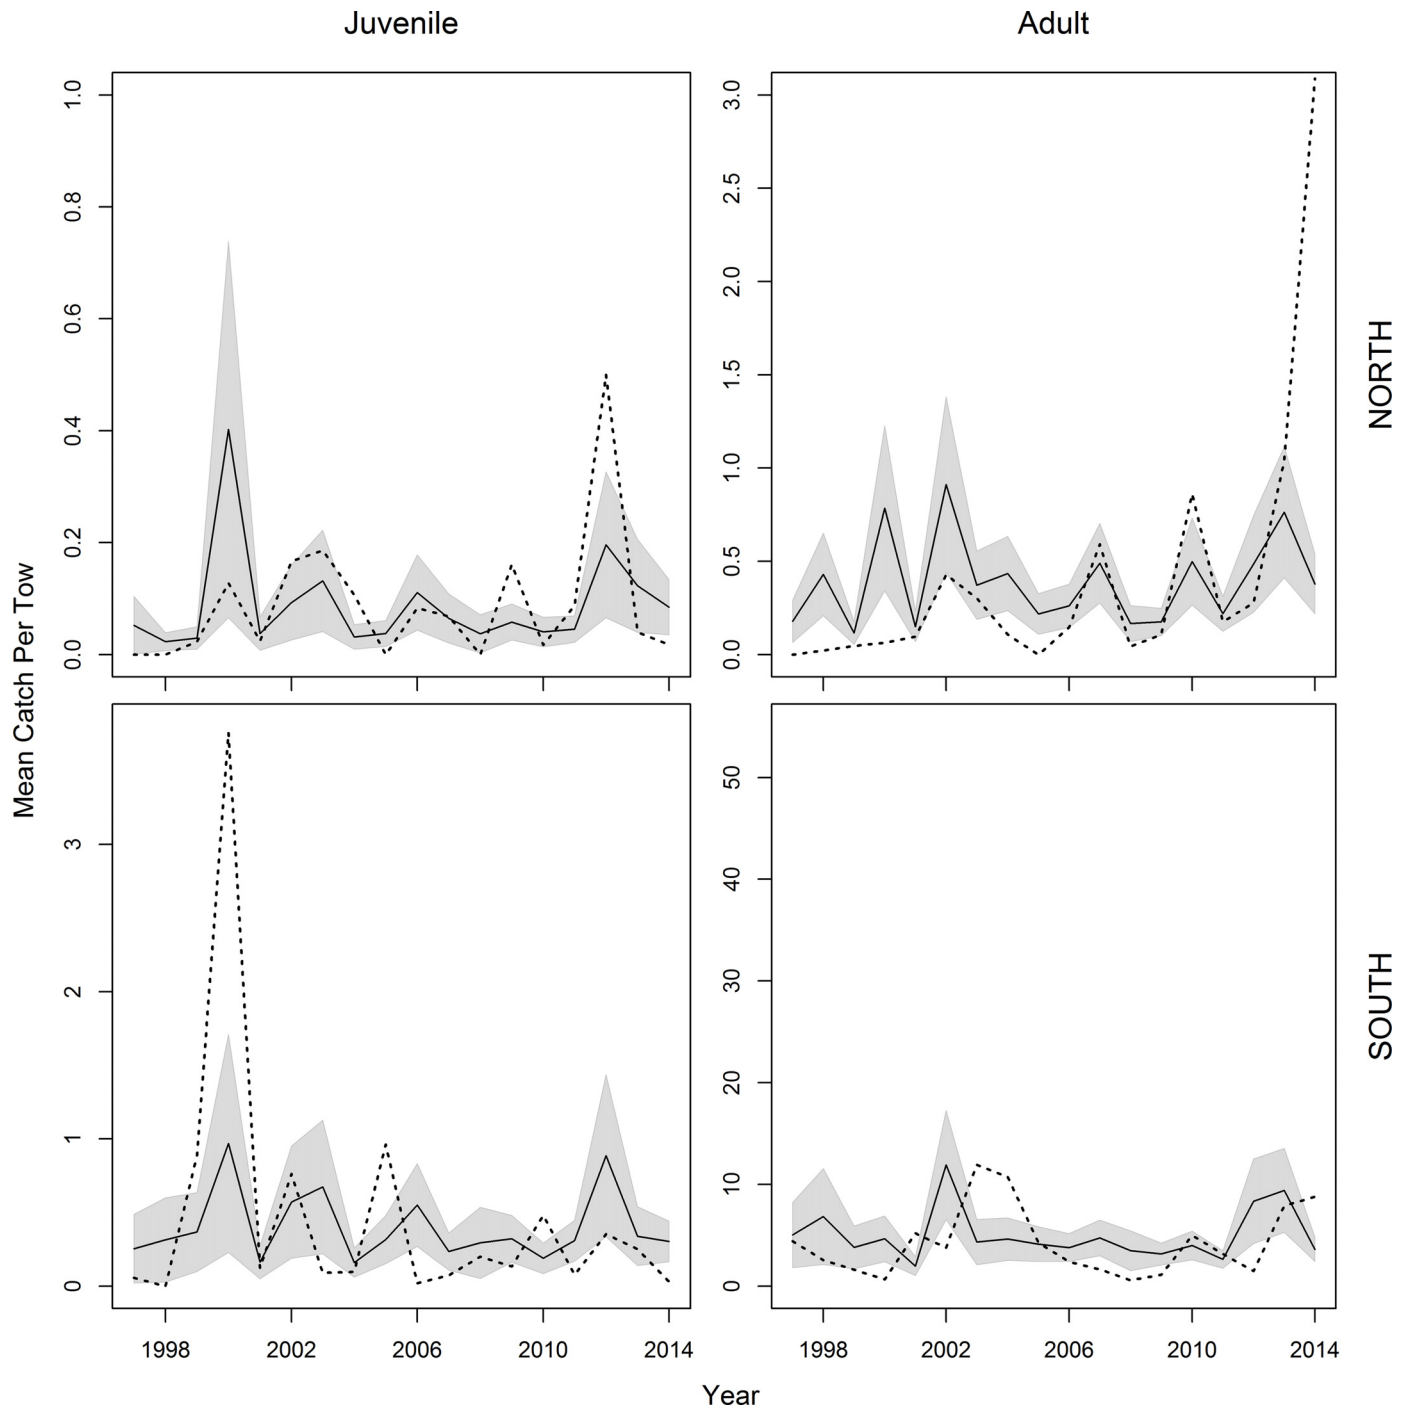

**Fig 6. Annual mean catch (n) per tow of black sea bass on the NEFSC spring survey.** Data is constrained to survey strata used in the stock assessment. Solid black lines represent model predicted values with 2 standard error confidence intervals shown by the grey surrounding areas. Empirical mean catch of the raw data is denoted by a dotted line.

doi:10.1371/journal.pone.0156355.g003

### Reference

1. Miller AS, Shepherd GR, Fratantoni PS (2016) Offshore Habitat Preference of Overwintering Juvenile and Adult Black Sea Bass, *Centropristis striata*, and the Relationship to Year-Class Success. PLoS ONE 11(1): e0147627. doi:10.1371/journal.pone.0147627 PMID: 26824350
